# Supplementary material for: Cystatin F Ensures Eosinophil Survival by Regulating Granule Biogenesis
Source: PubMed Central journal article supplement (PMC4846977; doi:10.1016/j.immuni.2016.03.003), 2016-04-19
Supplement: mmc1.pdf [file mmc1.pdf]

**Immunity, Volume 44**

**Supplemental Information**

**Cystatin F Ensures Eosinophil Survival**

**by Regulating Granule Biogenesis**

**Stephen P. Matthews, Sarah J. McMillan, Jeff D. Colbert, Rachel A. Lawrence, and Colin Watts**

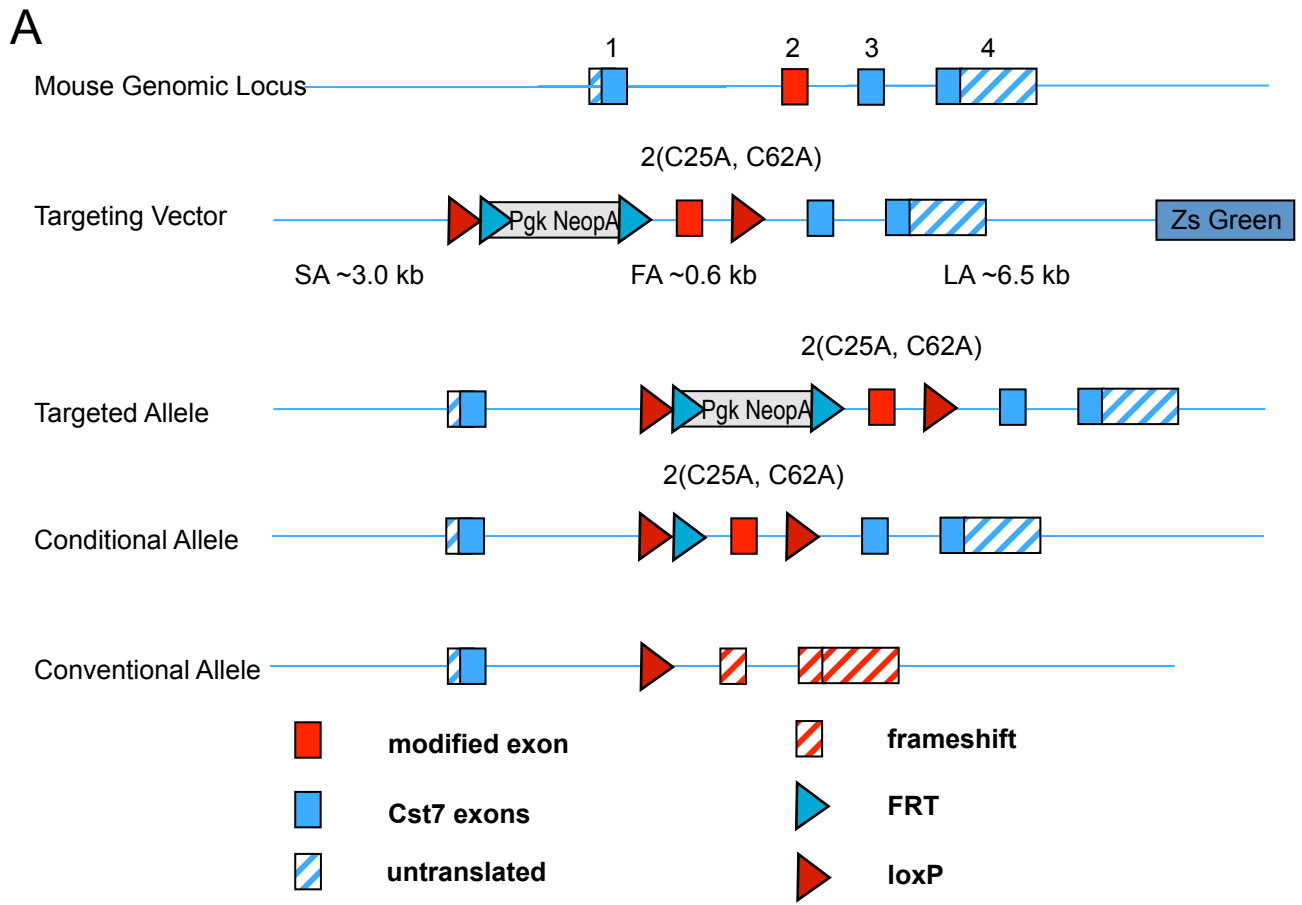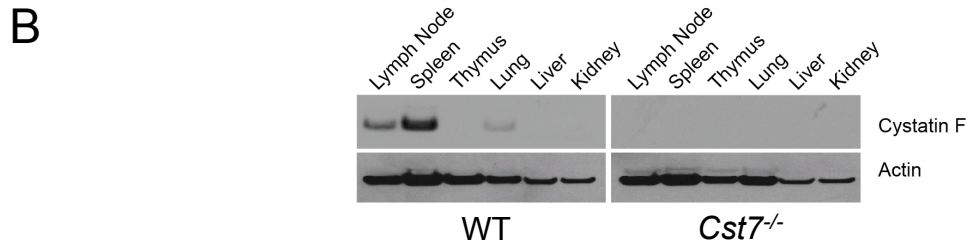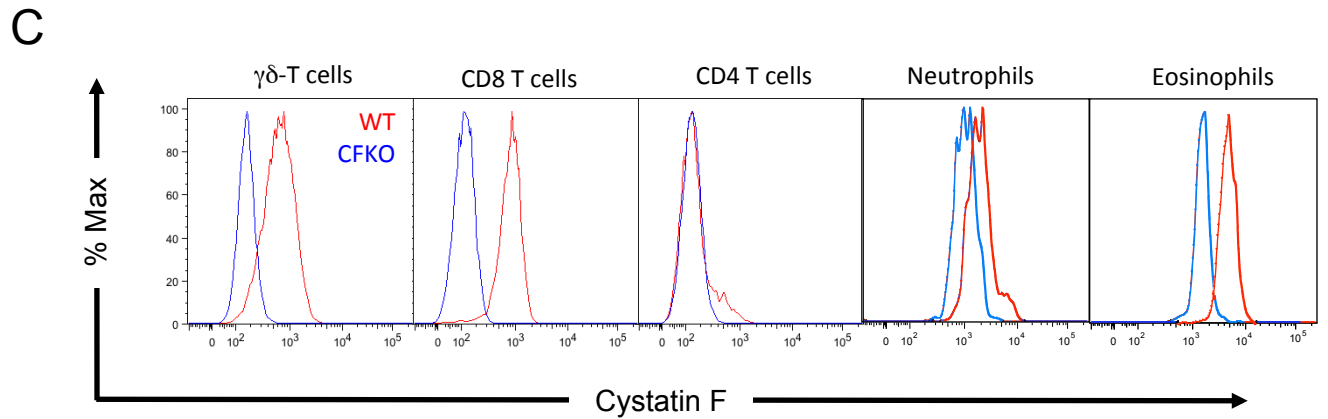

Figure S1

Figure S1, related to Experimental Procedures: Generation and characterization of CF-null mice (*Cst7*<sup>-/-</sup>).

(A). Overview of targeting strategy for generation of CF-null mice.

B, C: Confirmation of CF deletion in *Cst7*<sup>-/-</sup> mice. (B) Whole tissue lysates were prepared from the indicated organs, separated by reducing SDS-PAGE and immunoblotted for detection of cystatin F and  $\beta$ -actin. CF protein is expressed in lymph node, spleen & lung of wild type control but not *Cst7*<sup>-/-</sup> mice. (C)

Intracellular staining & flow cytometric detection of CF in the indicated cell subsets directly ex vivo. CF is specifically expressed in wild type leucocytes (red) that elaborate specialized exocytic granules (CD8<sup>+</sup> T cells,  $\gamma\delta$  T cells, neutrophils & eosinophils) but not in CD4<sup>+</sup> T cells. Expression is lost in *Cst7*<sup>-/-</sup> cells (blue).

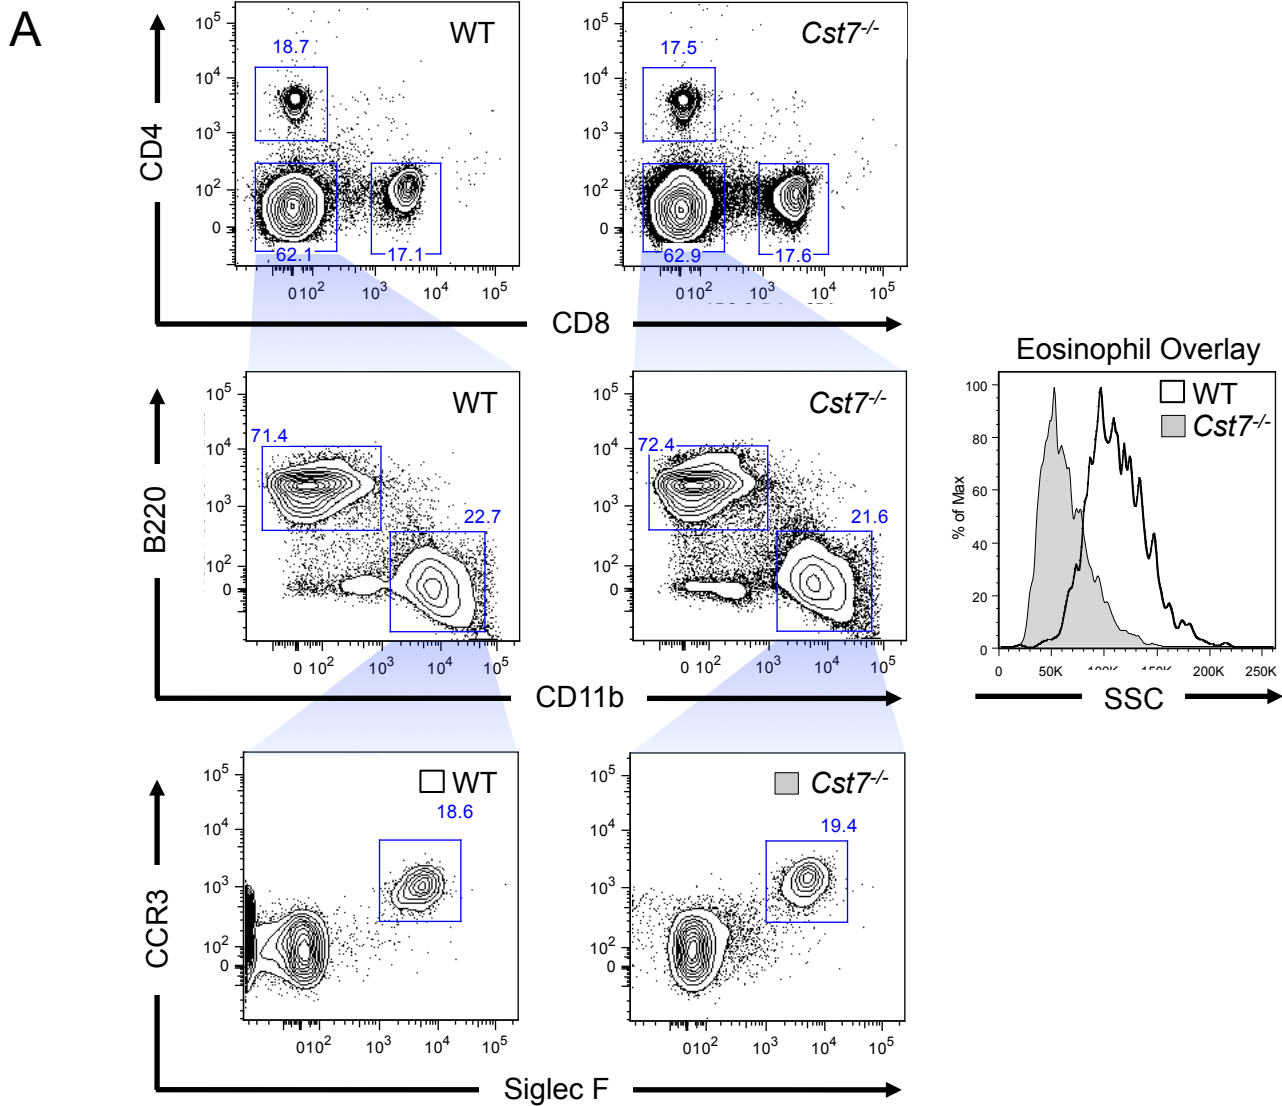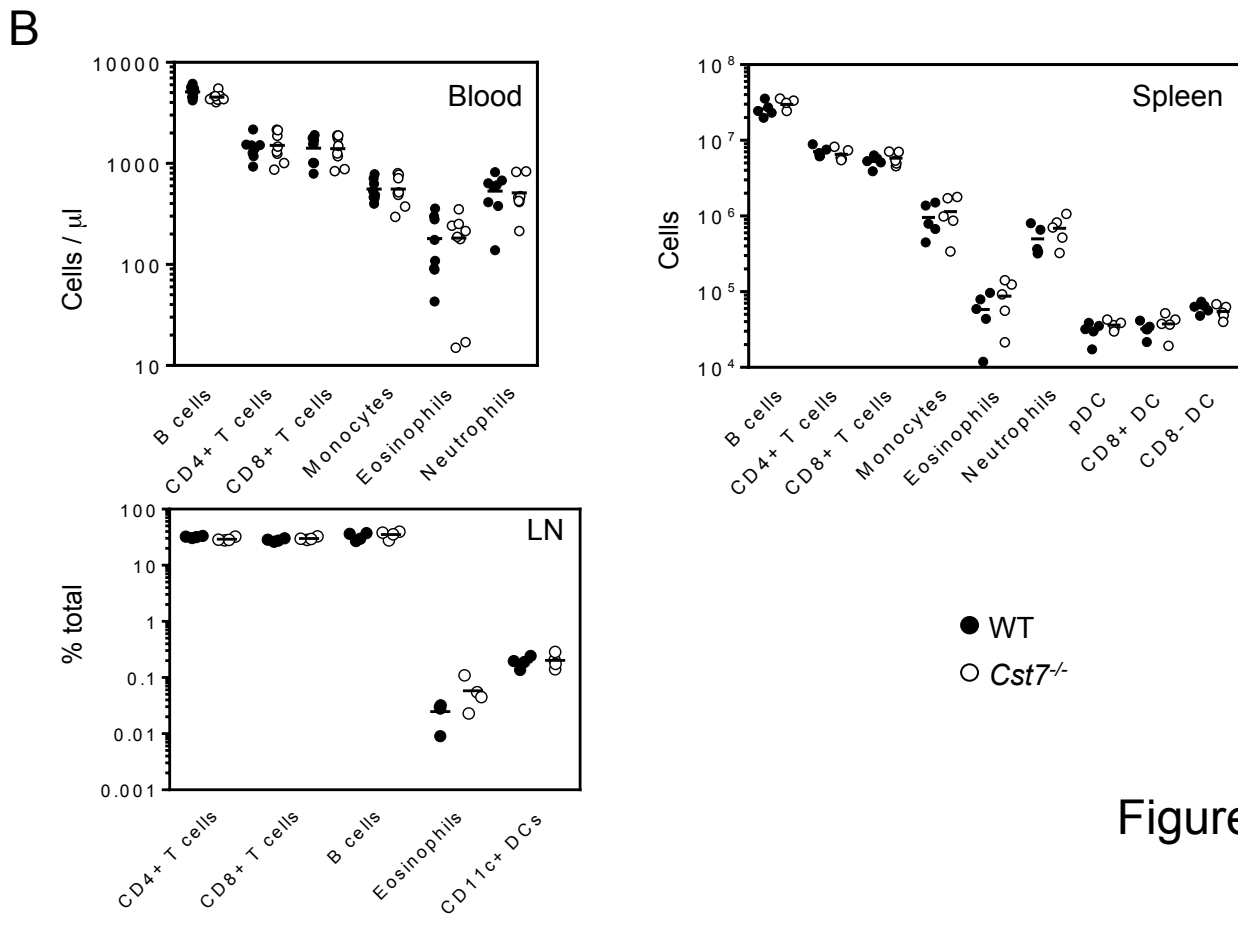

Figure S2

Figure S2, related to Figure 1: Phenotypic analysis of leucocyte populations in CF null mice.

Peripheral blood leucocyte subsets were analysed by flow cytometry. (A) Typical gating strategy for identification of white blood cells including eosinophils (CD11b<sup>+</sup> CCR3<sup>+</sup> Siglec F<sup>+</sup>). (B) Counts for the indicated leucocyte populations in peripheral blood, spleen & brachial lymph node. Values for individual mice plus means for each group are shown.

A

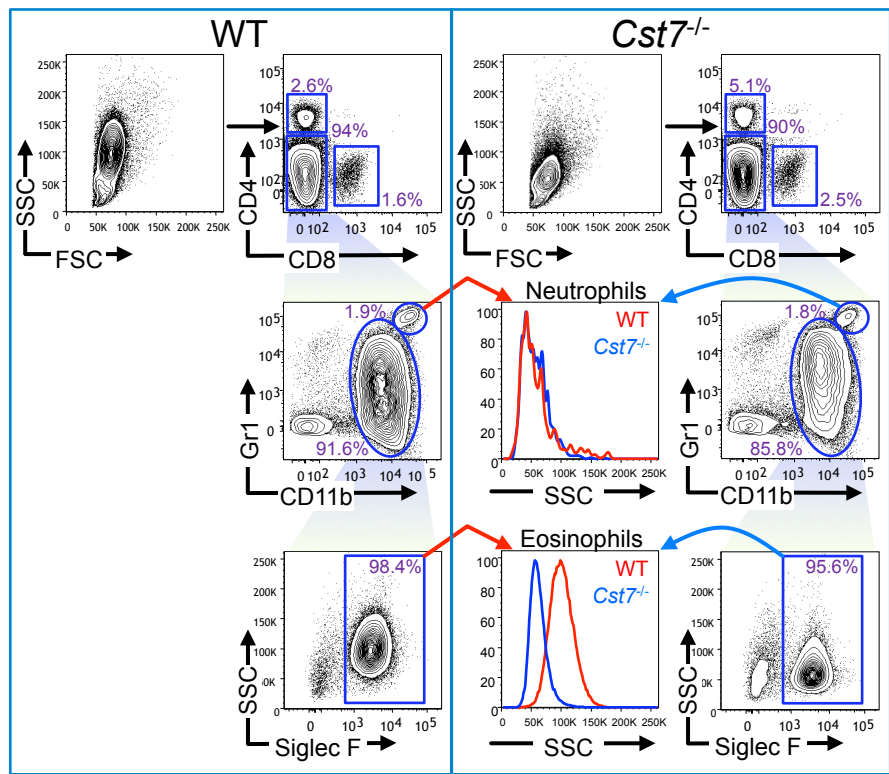

B

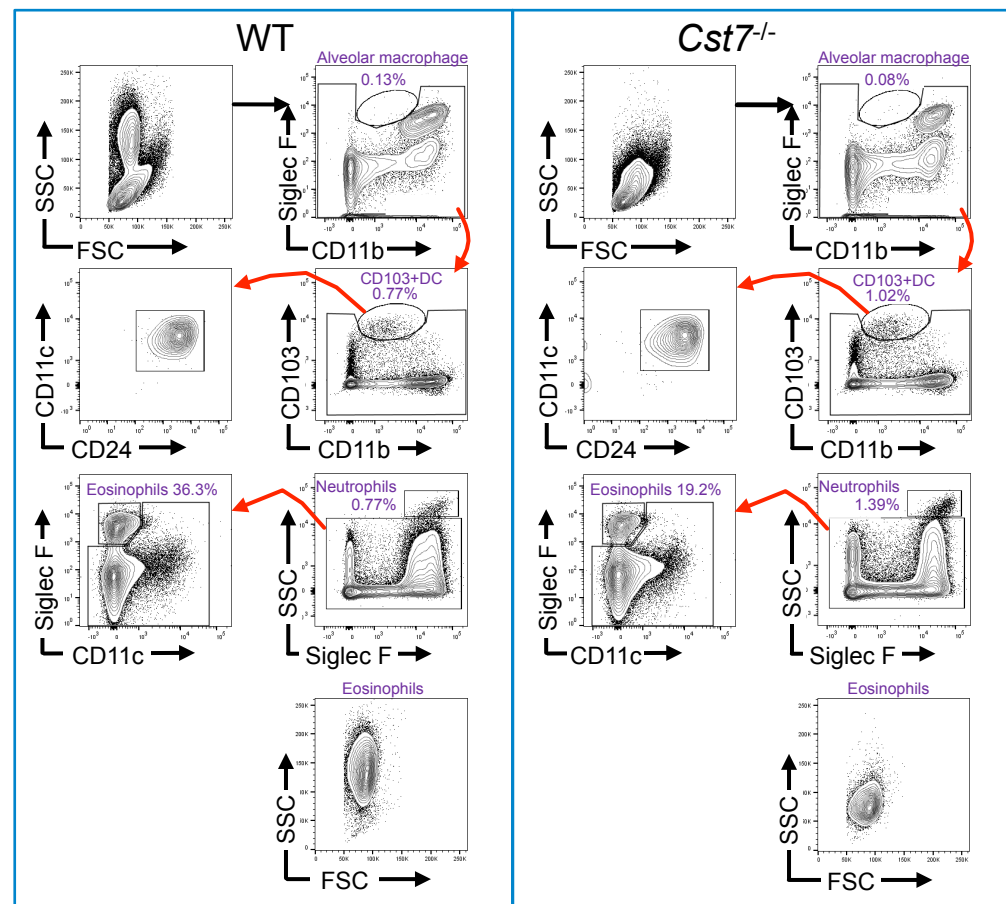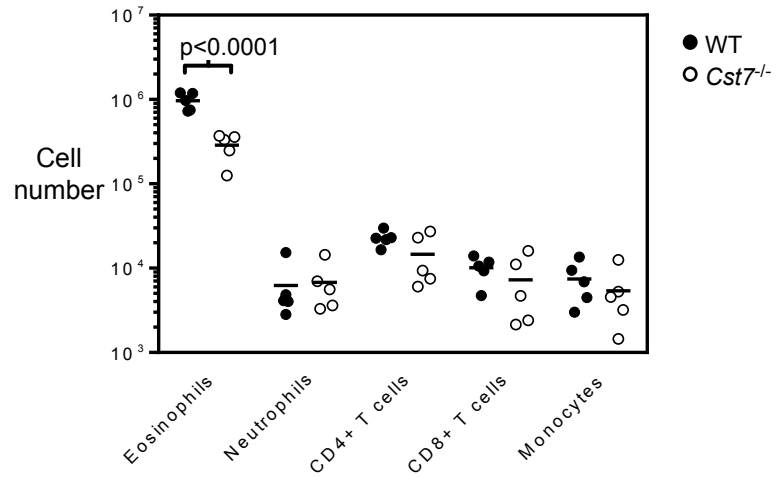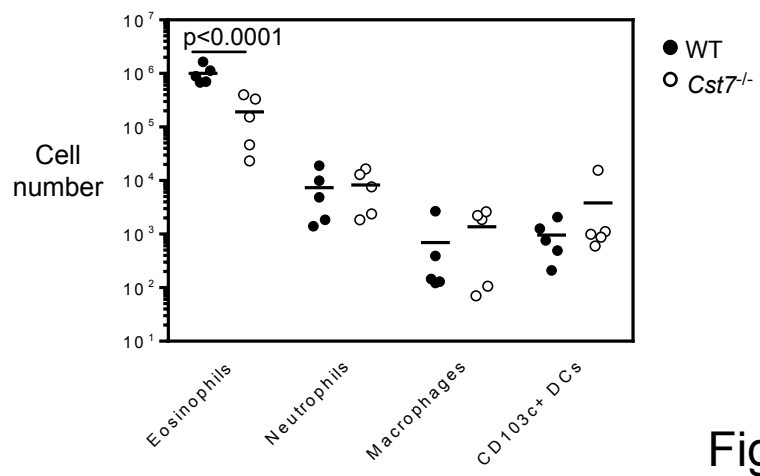

Figure S3

Figure S3, related to Figure 1: Phenotypic analysis of leucocyte subsets in allergic lungs.

(A) FACS staining strategy for identification of major leucocyte subsets in the BALF of ova-sensitized mice after 5d of ova-aerosol. Lower panel: total cell counts (values for individual mice plus means).

(B) FACS staining strategy for identification of alveolar macrophages and tissue dendritic cells in whole lung digests. Lower panel: cell numbers for individual mice plus means.

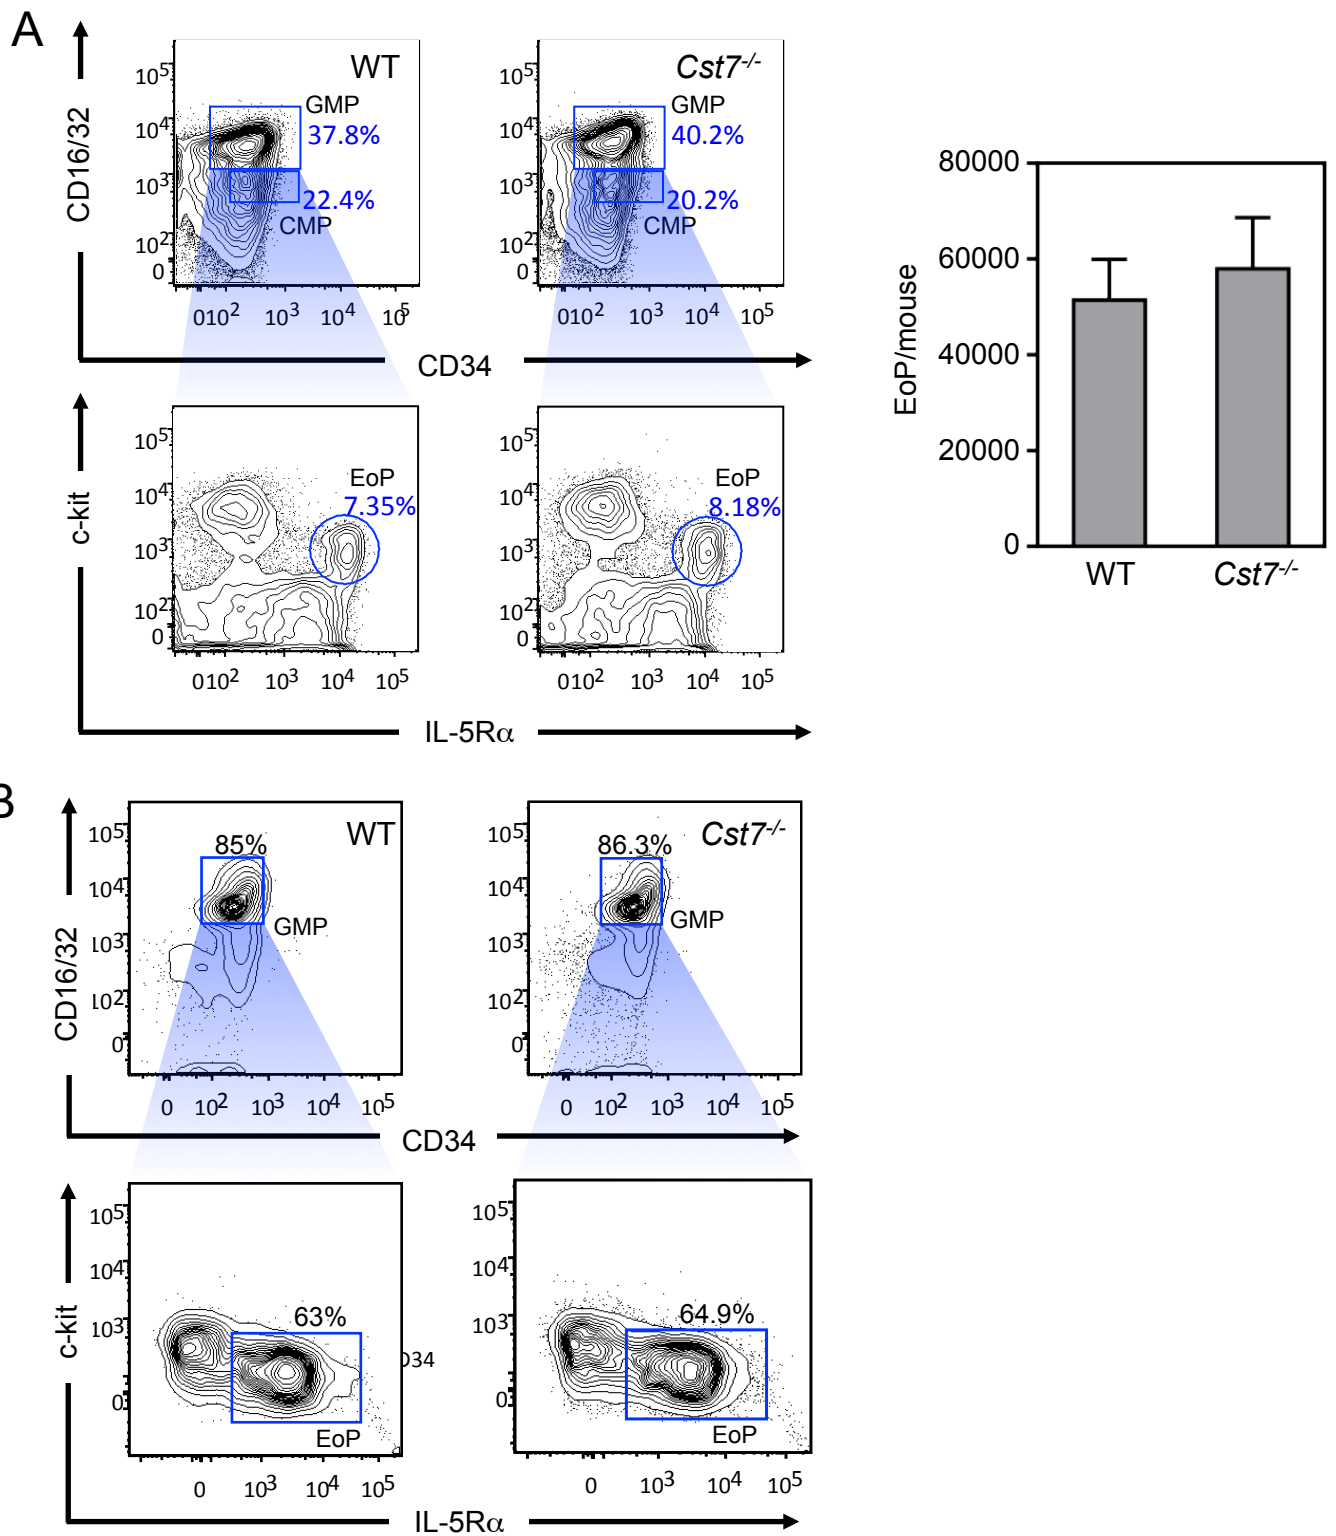

Figure S4, related to Figure 2: Eosinophil precursors are unaffected in CF null mice. (A) Lineage-positive bone marrow cells were excluded from analysis by staining with CD3, CD4, CD8 $\alpha$ , CD19, B220 and Gr1 and common myeloid precursors (CMP; CD34<sup>+</sup> CD16/32<sup>mid</sup>) and granulocyte-macrophage precursors (GMP; CD34<sup>+</sup> CD16/32<sup>high</sup>) were identified from the remaining fraction. Similar proportions of c-kit<sup>mid</sup> IL-5R $\alpha$ <sup>+</sup> eosinophil precursors (EoP) were detected within the GMP populations of wild type and *Cst7*<sup>-/-</sup> mice. Histogram: Total EoP count per femur (mean  $\pm$ SEM, n = 4 mice). (B) Equivalent proportions of GMP & EoP in bone marrow cultures from wild type and *Cst7*<sup>-/-</sup> mice expanded for 4 days in Flt3-L & SCF-1.



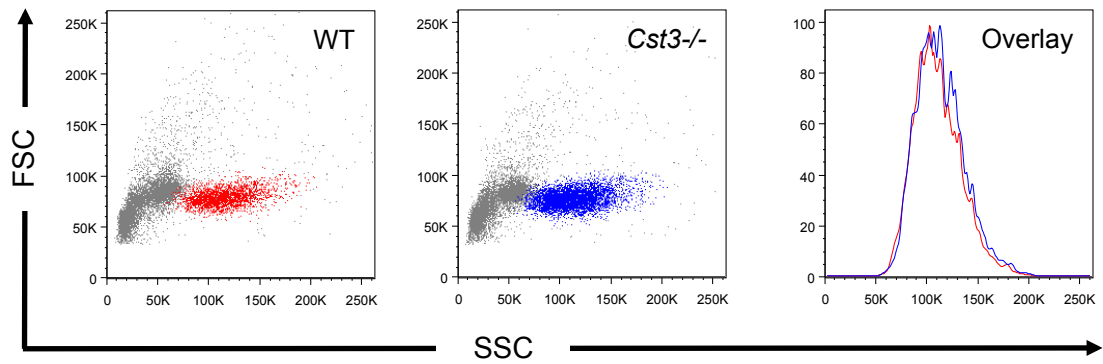

Figure S5, related to Figure 2: Cystatin C is not required for eosinophil granule integrity. Eosinophils were identified in peripheral blood from age-matched wild type or cystatin C null mice (*Cst3*<sup>-/-</sup>) by Siglec F staining. Granularity was normal in the absence of cystatin C (side scatter overlays).

**A**

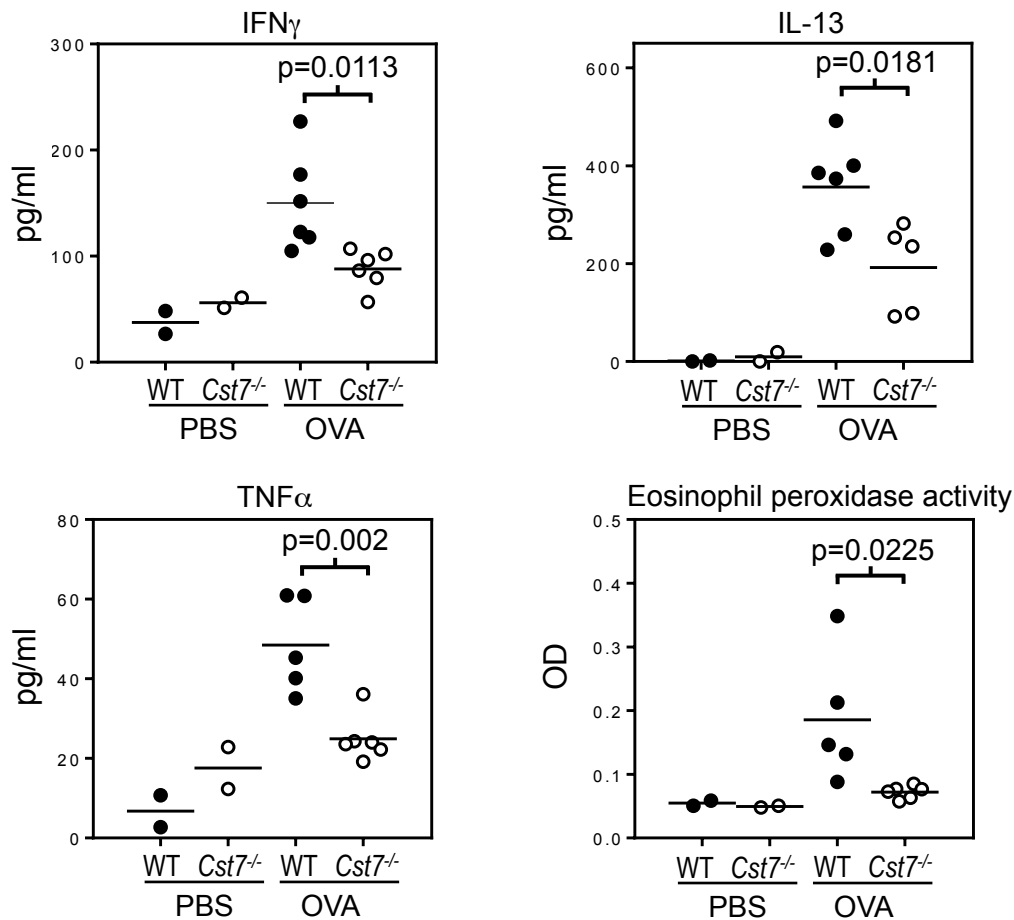

**B**

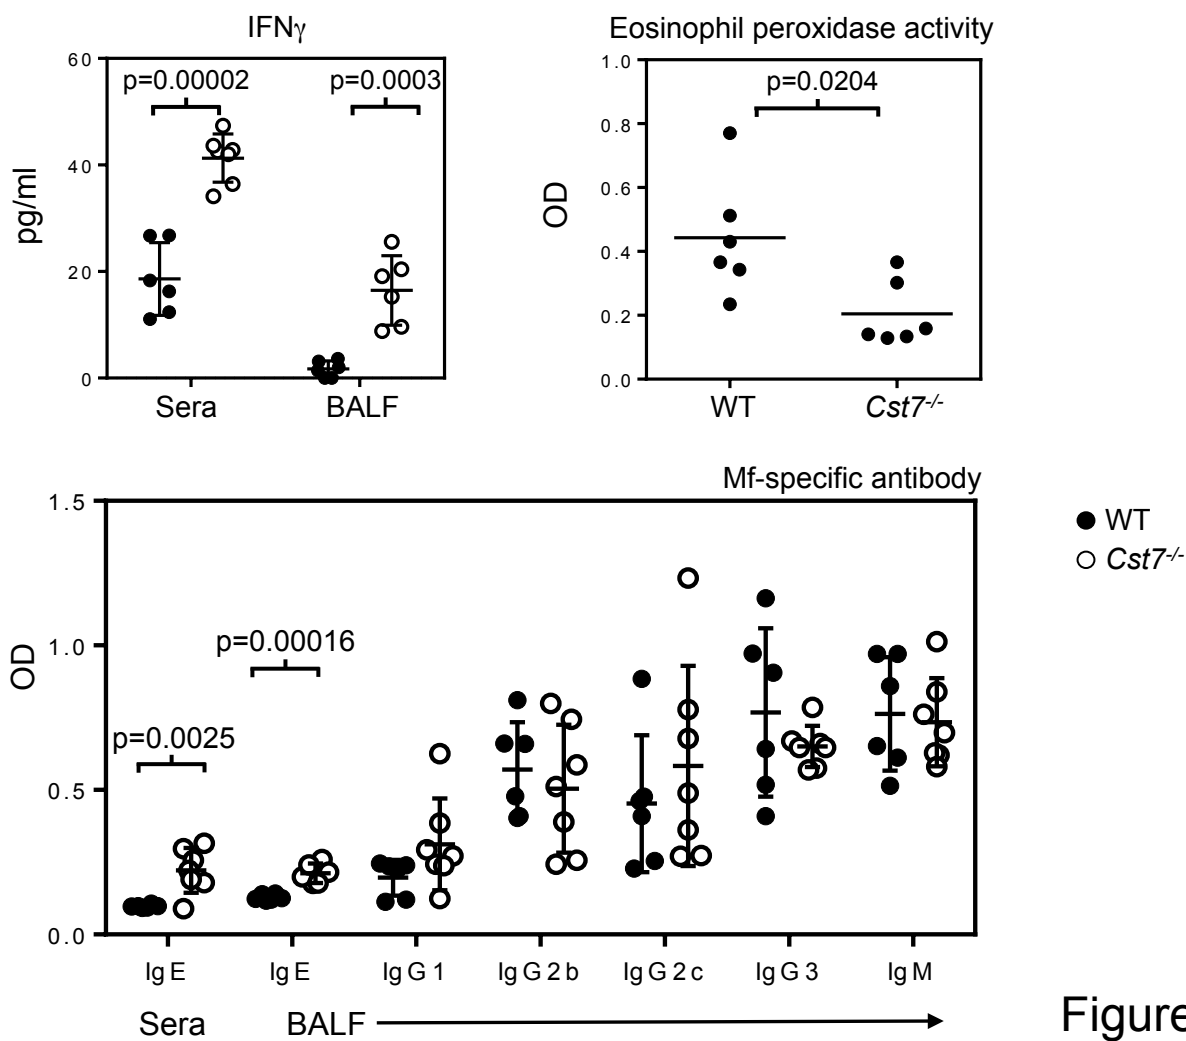

Figure S6

Figure S6, related to Figure 7: CF null mice display altered inflammatory parameters during eosinophilic inflammation.

(A) Levels of IFN $\gamma$ , IL-13, TNF $\alpha$  and Epx were measured in cell-free BAL fluid from mice sensitized to OVA and sacrificed after 5 days of aerosol exposure (acute protocol). Values for individual mice plus means for each group are shown.

(B) IFN $\gamma$  and Mf-specific antibody titres were quantitated in BAL fluid & sera collected 28 days after infection with *B. malayi* Mf. Reduced Epx activity was also detected in the cell-free BALF. Data represent values for individual mice plus means for each group.

Table S1, related to main text Figure 6: Identification of eosinophil granule proteins by LC-MS/MS.

Granules were released from *in vitro* cultured bone marrow eosinophils by mechanical lysis followed by intermediate-speed centrifugation (10 000g; 30min) of the post-nuclear supernatant (Ackerman et al, *J. Immunol* 1983 (131): p2977-82). Washed granule pellets were solubilized in RapiGest (Waters Ltd, UK), reduced, alkylated and digested with trypsin. 1.5µg of granule lysates were analysed with an Orbitrap Velos Pro mass spectrometer coupled to an Ultimate 3000 UHPLC system and protein identification and label-free quantification (LFQ) were performed using MaxQuant Version 1.3.0.5. Granules from 3 independent eosinophil preparations were analysed and 2498 proteins were identified. Protein IDs are presented in decreasing order of mean LFQ intensity (= abundance).
